# Supplementary material
Source: PubMed Central journal article supplement (PMC2395123)

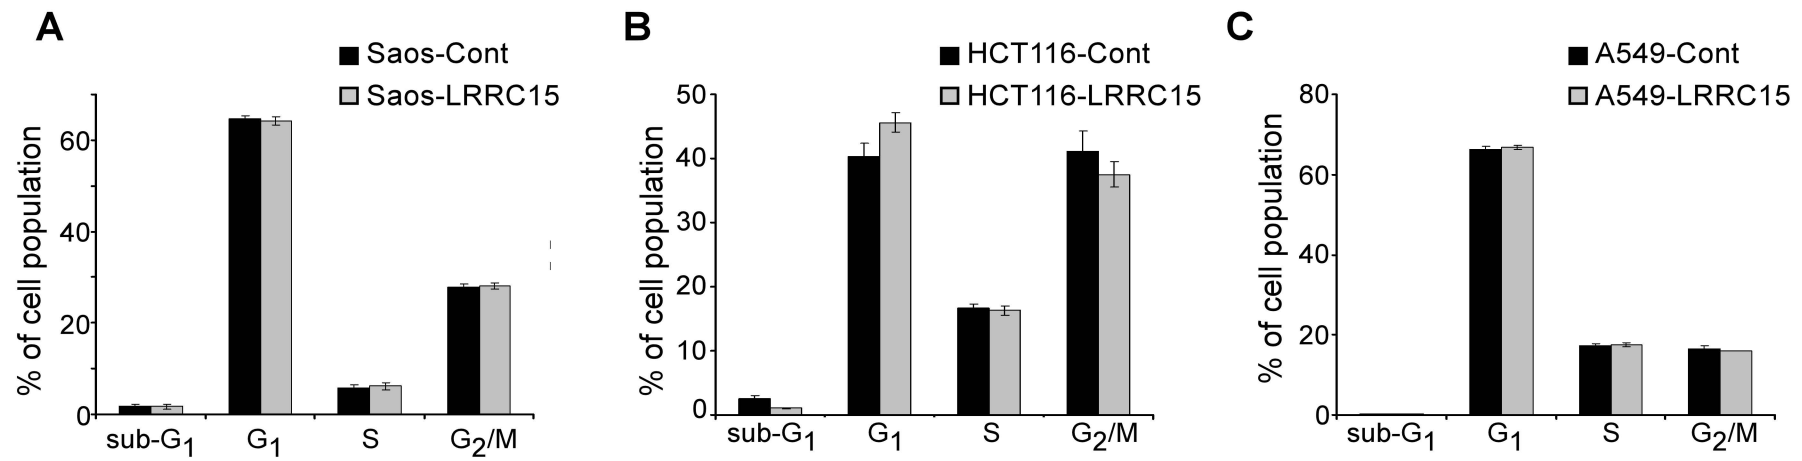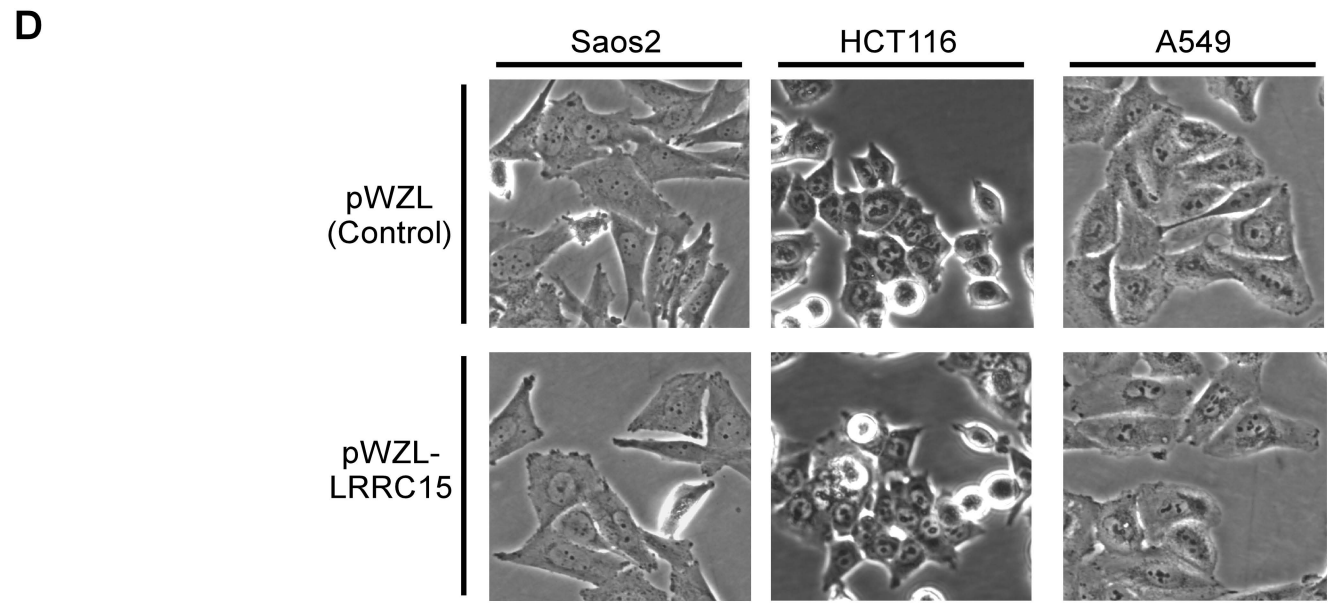

Supplement: supp_82_12_5933__1.pdf [file supp_82_12_5933__1.pdf]
